# Supplementary material for: A novel fluorescent probe for rapid and selective detection of fluoride ions in living cells
Source: Royal Society of Chemistry journal article supplement (doi:10.1039/d4ay02173h), 2025-01-01
Supplement: d4ay02173h1.pdf [file d4ay02173h1.pdf]

## Supporting Information

### A Novel Fluorescent Probe for Rapid and Selective Detection of Fluoride Ions in Living Cells

Tingting Feng<sup>1</sup>, Jiaxue Yang<sup>1</sup>, Yi Wang<sup>1</sup>, Taozhu Hu<sup>1</sup>, Longjia Yan<sup>1,2</sup>, Yi Le<sup>1,2</sup>, Li Liu<sup>1,2,\*</sup>

<sup>1</sup> School of Pharmaceutical Sciences, Guizhou University, Guiyang 550025, China

<sup>2</sup> Guizhou Engineering Laboratory for Synthetic Drugs, Guiyang 550025, China

E-mail: lliu2@gzu.edu.cn (Li Liu)

### Contents

|                                                                         |           |
|-------------------------------------------------------------------------|-----------|
| <b>1. Materials and Instruments .....</b>                               | <b>2</b>  |
| <b>2. Preparation of probe solution and fluorescence analysis .....</b> | <b>2</b>  |
| <b>3. Cell cytotoxicity assay and Cell image .....</b>                  | <b>2</b>  |
| <b>4. Synthesis and characterization .....</b>                          | <b>3</b>  |
| <b>5. Supporting tables .....</b>                                       | <b>13</b> |

## 1. Materials and Instruments

All chemicals were purchased from Sigma-Aldrich (Shanghai) Co., Ltd. and were of analytical grade.  $^1\text{H}$  NMR and  $^{13}\text{C}$  NMR spectra were recorded on a Bruker (Avance) 400 MHz NMR instrument. The melting point was measured in an X-4X digital micromelting point analyzer (Shanghai Microelectronics Technology Co., Ltd.). Absorption spectra were recorded on a UV-5500PC UV-visible spectrophotometer (Shanghai Meitai Instrument Co., Ltd.). Fluorescence spectra were measured on a fluorescence photometer (Hitachi F4700, Japan). Additionally, a microplate reader (TECAN, Infinite M200) was used in the study. Confocal fluorescence imaging in cells were recorded with a Nikon CSU-W1. All of the above instruments were provided by the School of Pharmacy, Guizhou University.

Mass spectra were recorded on a TSQ 8000 high-resolution mass spectrometer (Thermo Fisher Scientific Co. Ltd.).

## 2. Preparation of probe solution and fluorescence analysis

The probes **DTP** was dissolved in dimethyl sulfoxide (DMSO) to make a stock solution of  $1 \times 10^{-3}$  M. The stock solution of tetrabutylammonium fluoride (TBAF) was prepared in THF solution at a concentration of  $1 \times 10^{-1}$  M. A  $1 \times 10^{-3}$  M stock solution is prepared by dissolving various analytes in deionized water. Various common cations ( $\text{Na}^+$ ,  $\text{K}^+$ ,  $\text{Fe}^{2+}$ ,  $\text{Fe}^{3+}$ ,  $\text{Ni}^{2+}$ ,  $\text{Cu}^{2+}$ ,  $\text{Ag}^+$ , and  $\text{Zn}^{2+}$ ) were used in the form of sulfate ( $\text{SO}_4^{2-}$ ). Anions ( $\text{Cl}^-$ ,  $\text{Br}^-$ ,  $\text{I}^-$ ,  $\text{SO}_4^{2-}$ ,  $\text{H}_2\text{PO}_4^{2-}$ ,  $\text{HCO}_3^-$ ,  $\text{CO}_3^{2-}$ ,  $\text{SCN}^-$ ,  $\text{CH}_3\text{COO}^-$ ,  $\text{NO}_3^-$ ,  $\text{HPO}_4^-$ ) were used in the form of sodium ( $\text{Na}^+$ ) salts. Preparation of HEPES buffer: HEPES (23.8 g) was weighed and dissolved in purified water to form a 0.1 M HEPES purified water solution and stored in a refrigerator at 4 °C. All spectra were measured using a 10 mm  $\times$  10 mm cuvette with an excitation. All aqueous solutions were prepared with ultrapure water obtained from a Milli-Q water purification system.

## 3. Cell cytotoxicity assay and Cell image

Human hepatocellular carcinoma cells (HepG2 cells) were provided by Kunming Cell Bank, Chinese Academy of Sciences. HepG2 cells were cultured at 37 °C in a 5% CO<sub>2</sub> cell culture incubator. The in vitro cytotoxicity of **DTP** on HepG2 cells was assessed by an MTT assay. Cell viability was calculated using the formula: cell viability (%) = (mean absorbance of the drug group - mean absorbance of the blank group)/(mean absorbance of the untreated group - mean absorbance of the blank group)  $\times$  100%.

Fluorescence imaging of F<sup>-</sup> in HepG2 cells. Specific experiments were performed by the following subgroups: (a) **DTP** (10 μM) treatment for 10 min. (b) **DTP** (10 μM) pretreatment for 10 min, followed by incubation with TBAF (200 μM) for 30 min.

Before imaging, all cells were washed three times with PBS.

#### 4. Synthesis and characterization

Compound **2**: compound **1** (1090 mg, 3 mmol), 4-bromo-2-methoxybenzaldehyde (702.4 mg, 3 mmol), Na<sub>2</sub>CO<sub>3</sub> (629.65 mg, 6 mmol), Pd(PPh<sub>3</sub>)<sub>4</sub> (34.32 mg, 0.3 mmol), and Dioxane: H<sub>2</sub>O (1: 1) 20 ml were added to a 100 ml round-bottomed flask in a round-bottomed flask protected by argon. The reaction was heated to 110 °C for 3 h. After the reaction was completed, the reaction was quenched by adding water. DCM (40 ml × 3) was extracted, and the organic layer was collected, washed, dried, and spun dried under reduced pressure to obtain the crude product. PE/EA = 5/1 column chromatography yielded 408 mg of yellow solid in 43.63% yield. M.P.: 73.4-74.3 °C. <sup>1</sup>H NMR (400 MHz, CDCl<sub>3</sub>) δ 10.48 (d, *J* = 0.8 Hz, 1H), 7.88 (d, *J* = 8.0 Hz, 1H), 7.44 – 7.40 (m, 2H), 7.22 – 7.16 (m, 3H), 7.11 (d, *J* = 1.4 Hz, 1H), 6.98 – 6.89 (m, 3H), 4.01 (s, 3H), 3.90 – 3.86 (m, 2H), 1.92 – 1.85 (m, 2H), 1.06 (t, *J* = 7.4 Hz, 3H). <sup>13</sup>C{<sup>1</sup>H} NMR (100 MHz, CDCl<sub>3</sub>) δ 189.3, 162.2, 147.8, 145.7, 144.7, 134.0, 129.1, 127.5, 127.4, 126.2, 125.9, 125.5, 124.1, 123.4, 122.7, 118.9, 115.6, 109.4, 55.7, 49.3, 20.1, 11.3. ESI-HRMS C<sub>23</sub>H<sub>21</sub>NO<sub>2</sub>S ([M+Na]<sup>+</sup>) calcd 398.1185, found 398.1178.

Compound **3**: compound **2** (375 mg, 1 mmol) and DCM (10 ml) were added to a 50-ml round-bottom flask and cooled to 0 °C. BBr<sub>3</sub> (5010 mg, 20 ml) was added while stirring, and the reaction was stirred at room temperature for 1 h. After the reaction was completed, the reaction was quenched by adding NaHCO<sub>3</sub>. DCM (10 ml × 3) was extracted, and the organic layer was collected, washed, dried, and spun dried under reduced pressure to obtain the crude product. PE/EA = 5/1 column chromatography yielded 336 mg of pale yellow solid in 93.63% yield. M.P.: 98.3-99.4 °C. <sup>1</sup>H NMR (400 MHz, CDCl<sub>3</sub>) δ 11.14 (s, 1H), 9.91 (s, 1H), 7.59 (d, *J* = 8.0 Hz, 1H), 7.46 – 7.42 (m, 2H), 7.23 – 7.20 (m, 1H), 7.20 – 7.14 (m, 3H), 6.98 – 6.92 (m, 2H), 6.90 (dd, *J* = 8.0, 1.2 Hz, 1H), 3.90 – 3.85 (m, 2H), 1.93 – 1.83 (m, 2H), 1.06 (t, *J* = 7.6 Hz, 3H). <sup>13</sup>C{<sup>1</sup>H} NMR (100 MHz, CDCl<sub>3</sub>) δ 195.8, 162.1, 148.6, 146.1, 144.6, 134.1, 133.2, 127.5, 127.4, 126.3, 126.0, 125.5, 124.2, 122.8, 119.3, 118.1, 115.6, 115.5, 114.8, 49.3, 20.2, 11.3. ESI-HRMS C<sub>22</sub>H<sub>19</sub>NO<sub>2</sub>S ([M+Na]<sup>+</sup>) calcd 384.1028, found 384.1019.

Compound **4**: compound **3** (361 mg, 1 mmol), DMAP (146 mg, 1.2 mmol), TEA (303 mg, 3 mmol), and DCM (5 ml) were added to a 100-ml two-necked vial and cooled to 0 °C. TBSCl (452 mg, 3 mmol) was dissolved in DCM (5 ml) and added dropwise to the two-necked vial, and the reaction was allowed to proceed for 12 h at room temperature. After the reaction was completed, the reaction was quenched by adding water. DCM (20 ml × 3) was extracted, and the organic layer was collected, washed, dried, and spun dried under reduced pressure to obtain the crude product. PE/EA = 3/1 column chromatography yielded 354 mg of yellow oil in 74.6% yield. <sup>1</sup>H NMR (400 MHz, CDCl<sub>3</sub>) δ 10.47 (s, 1H), 7.86 (d, *J* = 8.0 Hz, 1H), 7.40 – 7.34 (m, 2H), 7.25 – 7.20 (m, 1H), 7.20 – 7.14 (m, 2H), 7.02 (d, *J* = 1.6 Hz, 1H), 6.98 – 6.93 (m, 2H), 6.90 (dd, *J* = 8.0, 1.2 Hz, 1H), 3.90 – 3.86 (m, 2H), 1.92 – 1.85 (m, 2H), 1.06 (d, *J* = 5.2 Hz, 12H), 0.34 (s, 6H). <sup>13</sup>C{<sup>1</sup>H} NMR (100 MHz, CDCl<sub>3</sub>) δ 189.6, 159.2, 147.5, 145.7, 144.7, 133.7, 128.8, 127.5, 127.4, 126.1, 125.8, 125.7, 125.5, 124.2, 122.7, 119.8, 117.8, 115.6, 115.5, 49.3, 25.7, 20.1, 18.4, 11.3. ESI-HRMS C<sub>28</sub>H<sub>33</sub>NO<sub>2</sub>SSi ([M+Na]<sup>+</sup>) calcd 498.1893, found 498.1884.

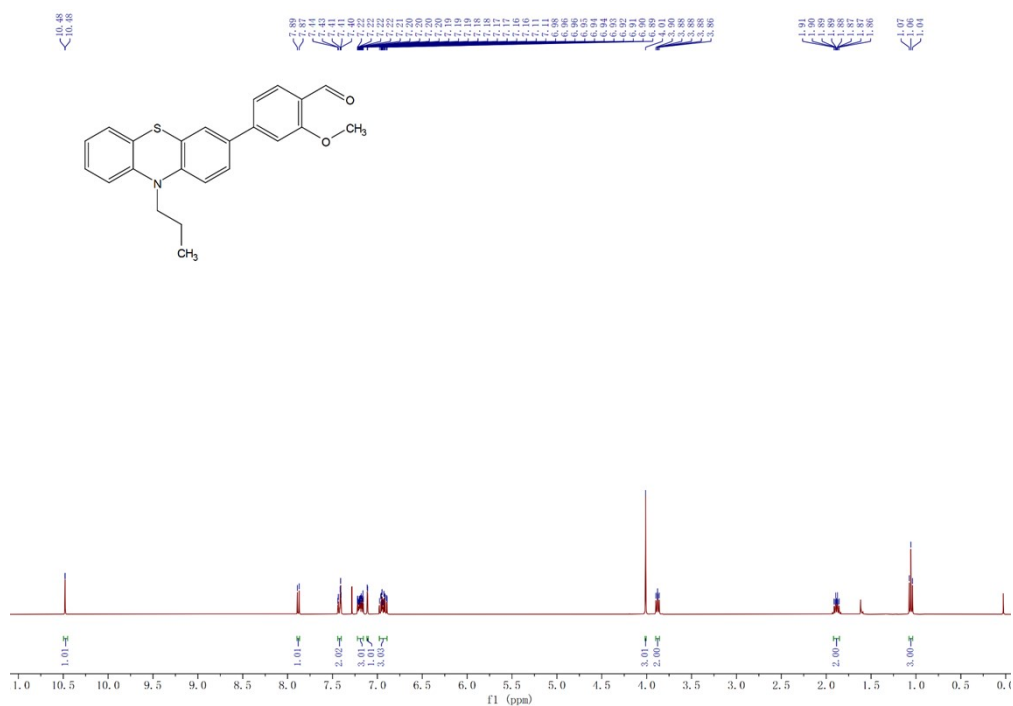

Fig. S1. <sup>1</sup>H NMR spectrum of **2**.

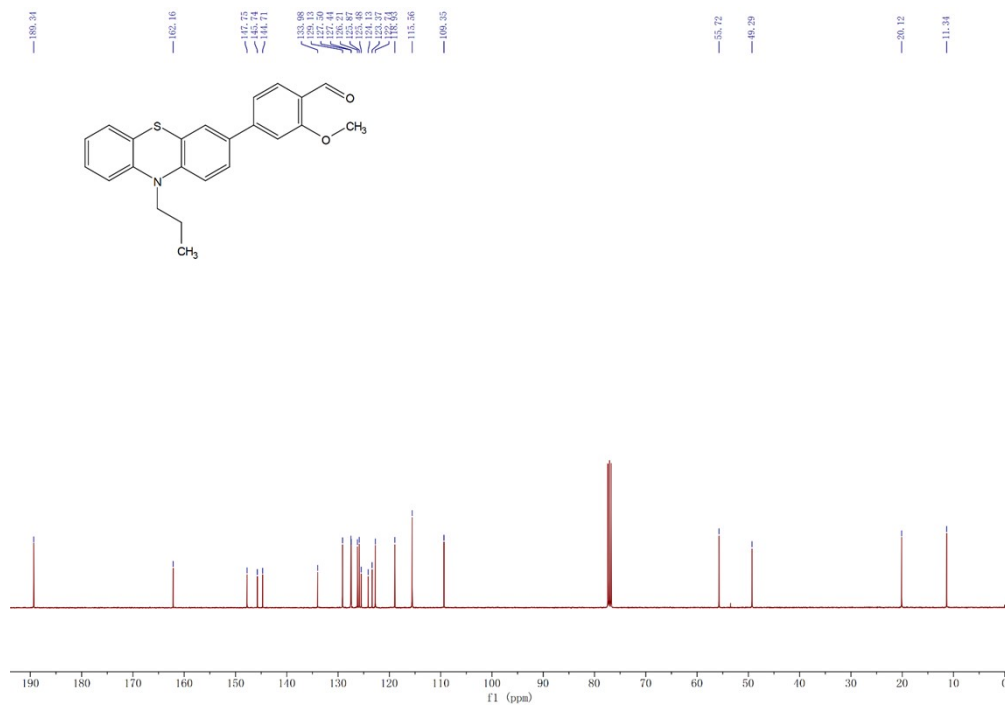

**Fig. S2.**  $^{13}\text{C-NMR}$  spectrum of **2**

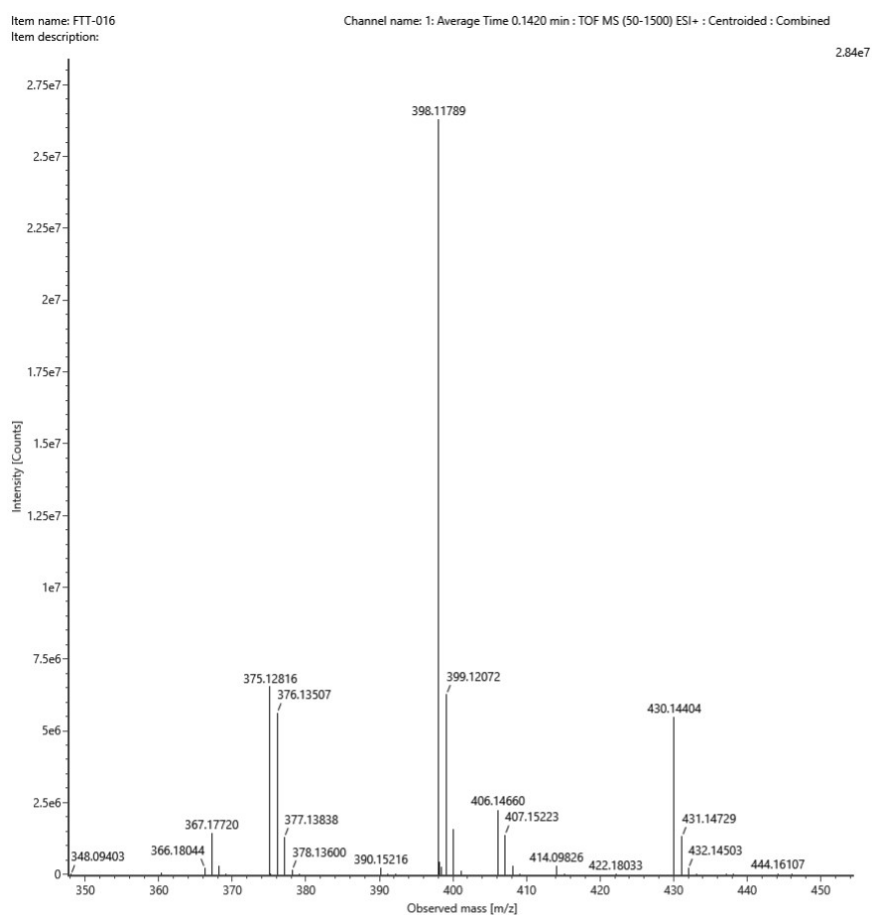

**Fig. S3.** HRMS spectrum of **2**





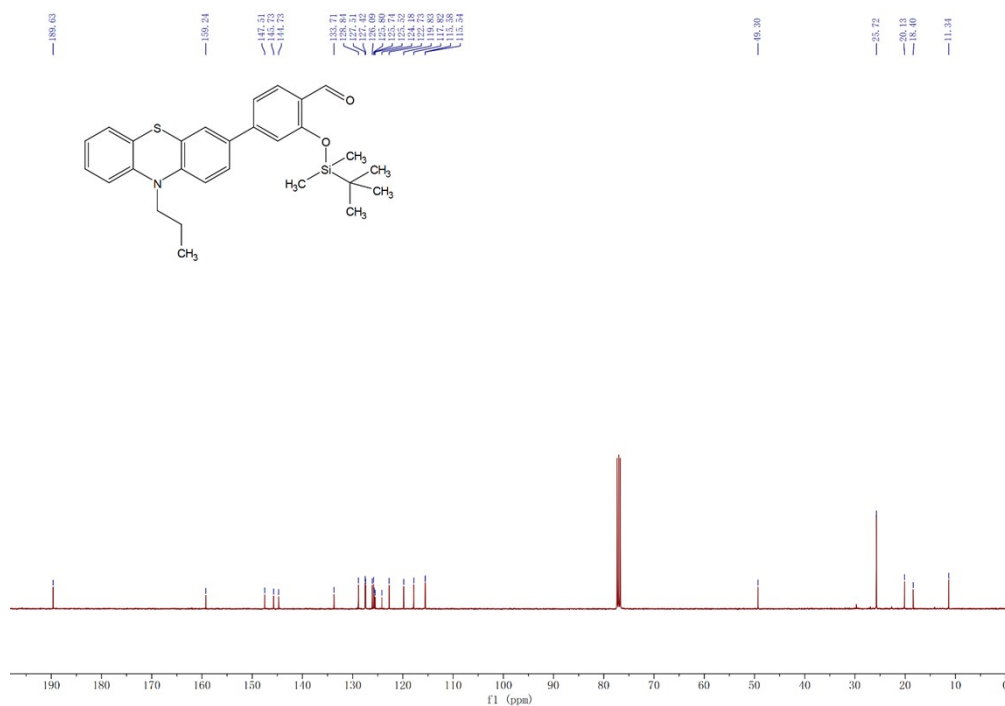

Fig. S8. <sup>13</sup>C-NMR spectrum of 4

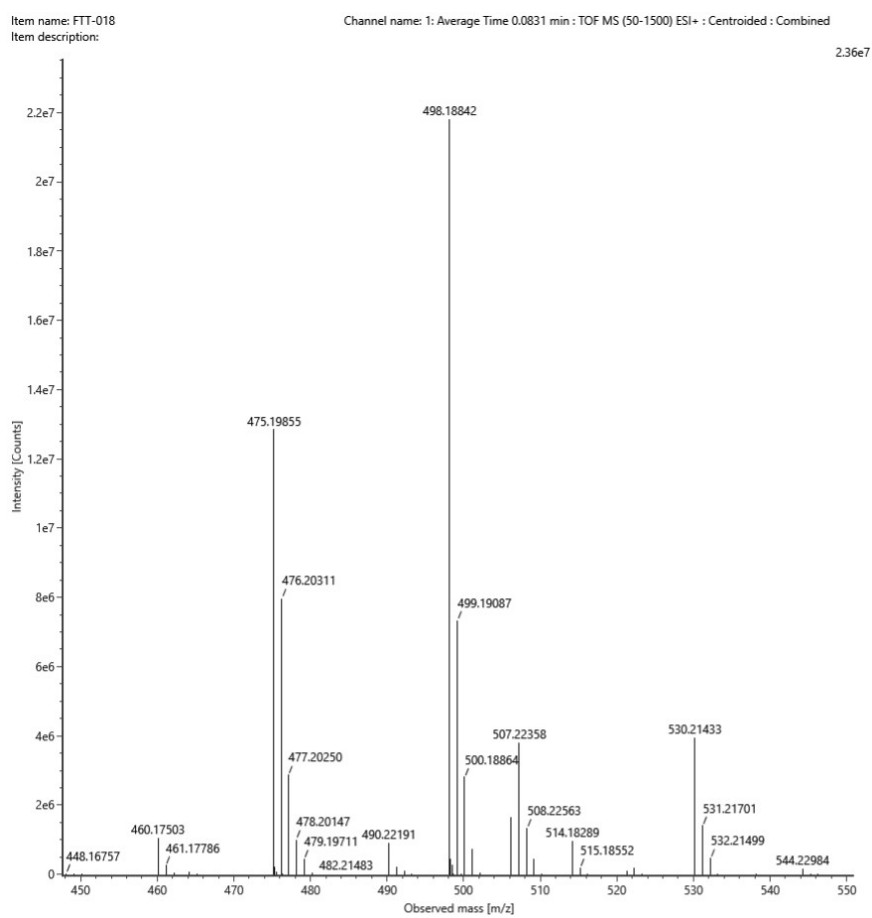

Fig. S9. HRMS spectrum of 4



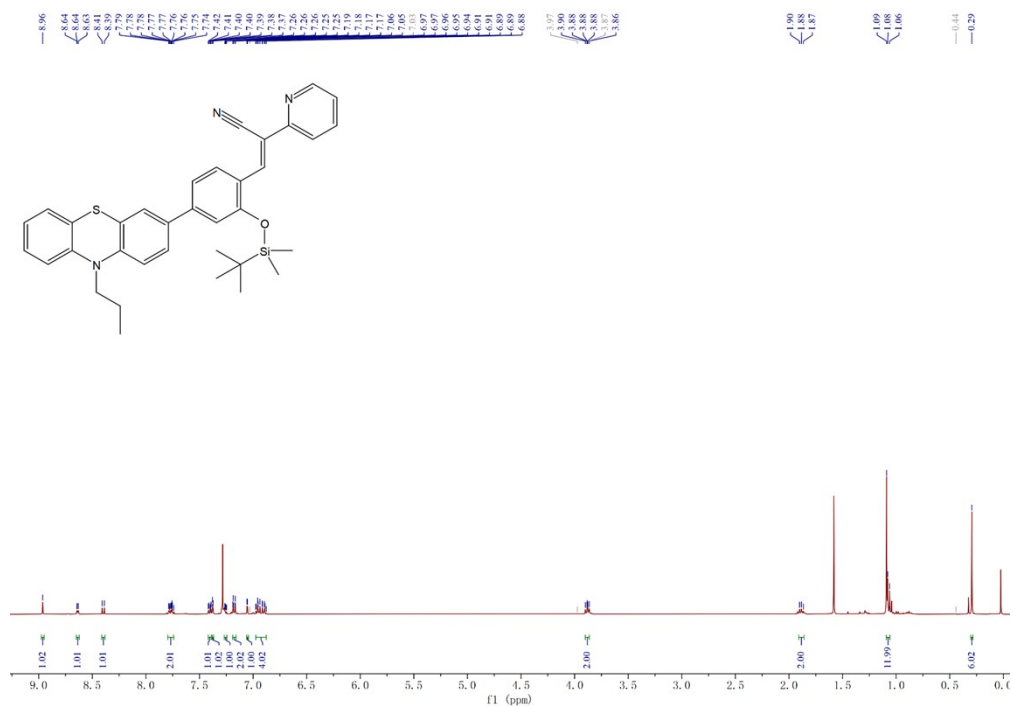

**Fig. S10.** <sup>1</sup>H NMR spectrum of DTP

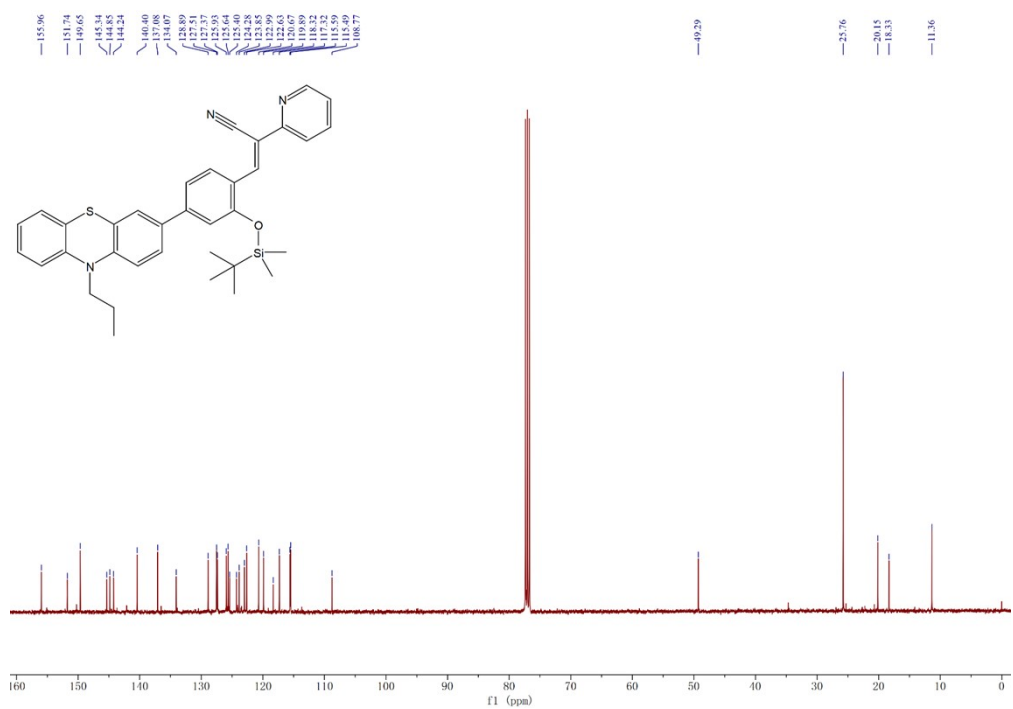

**Fig. S11.** <sup>13</sup>C-NMR spectrum of DTP

Item name: LD-308  
Item description:

Channel name: 1: Average Time 0.1174 min : TOF MS (50-1500) ESI+ : Centroided : Combined

7.37e6

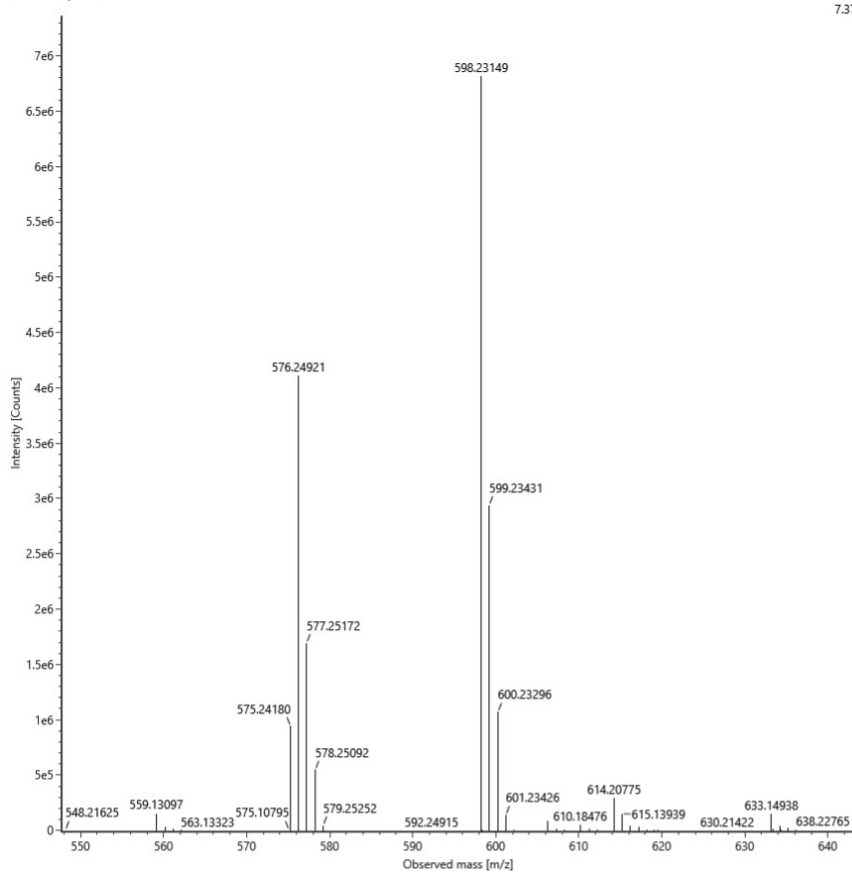

Fig. S12. HRMS spectrum of DTP

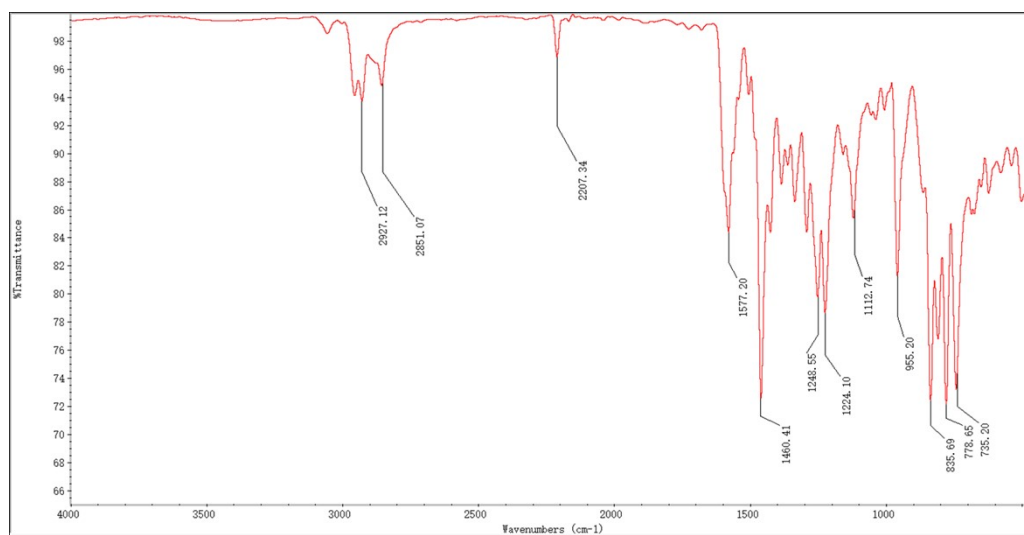

Fig. S13. FT-IR spectrum of DTP

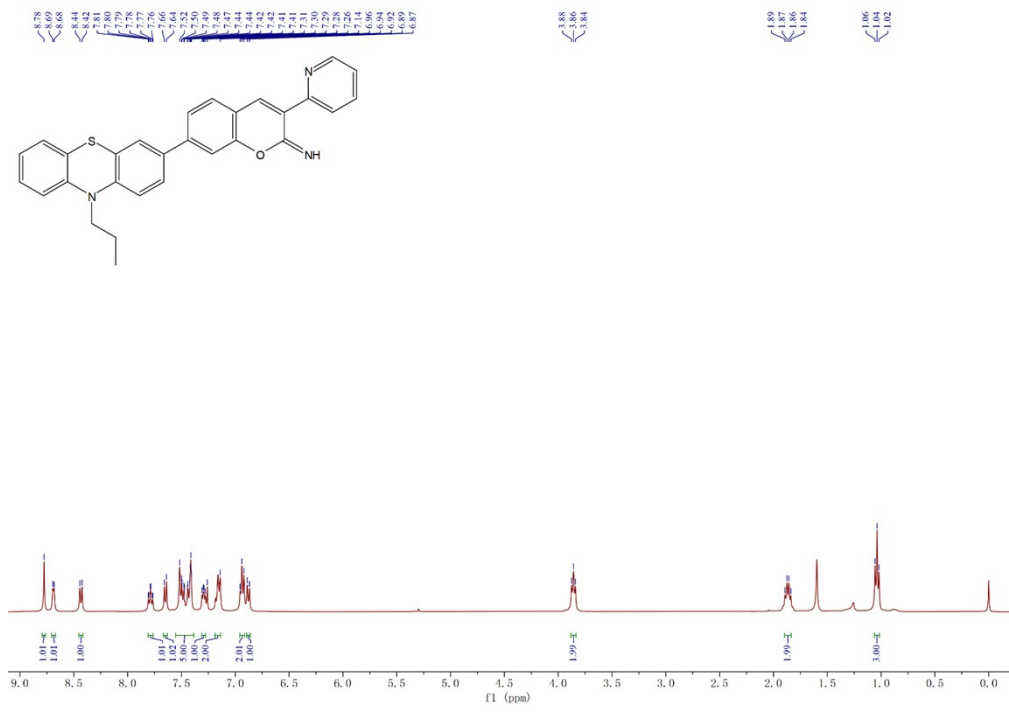

**Fig. S14.** <sup>1</sup>H NMR spectrum of DTP-F

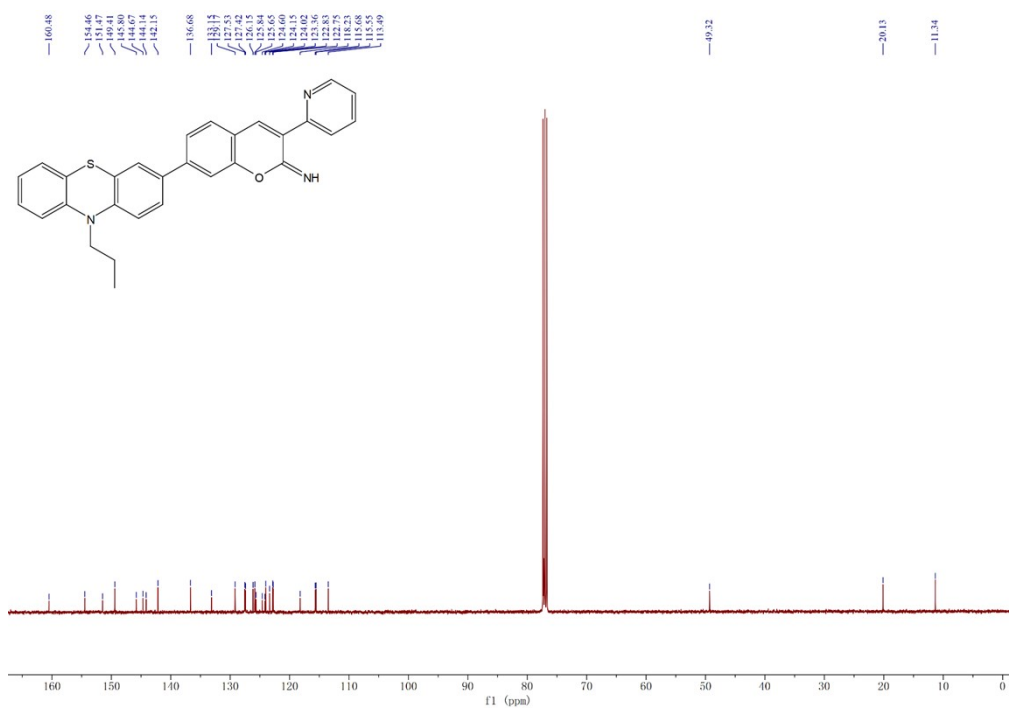

**Fig. S15.** <sup>13</sup>C-NMR spectrum of DTP-F

Item name: LD-324  
Item description:

Channel name: 1: Average Time 0.1174 min : TOF MS (50-1500) ESI+ : Centroided : Combined

6.45e6

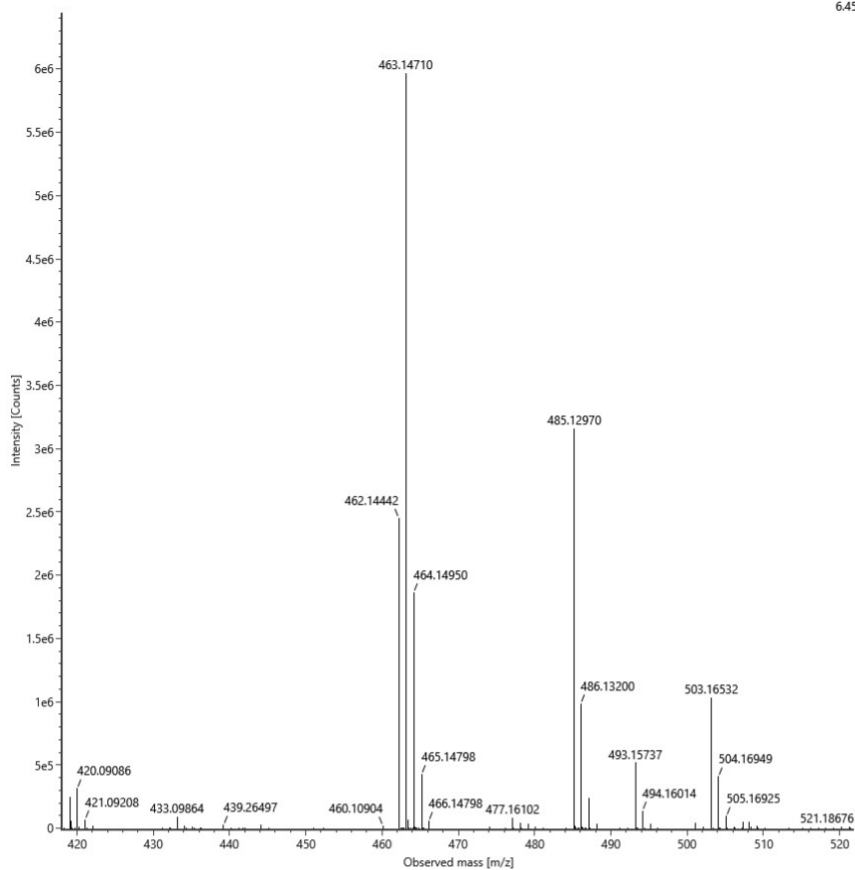

**Fig. S16.** HRMS spectrum of DTP-F

## 5. Supporting tables

**Table S1** Fluorescent probe for fluoride ions based on Si-O bond cleavage

| Probe     | Structure                                                                           | Solvent                             | Response time | Detection limit( $\mu\text{M}$ ) | $\lambda_{\text{ex/em}}$ (nm) | Reference |
|-----------|-------------------------------------------------------------------------------------|-------------------------------------|---------------|----------------------------------|-------------------------------|-----------|
| BIPA      | 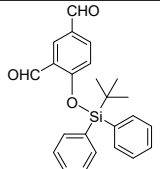   | Pure EtOH                           | 2 h           | 3.5                              | 320/480                       | 42        |
| Flu-Si    |    | CH <sub>3</sub> OH/H <sub>2</sub> O | -             | 0.025                            | 320/532                       | 43        |
| Silyl-KIZ |   | PBS                                 | 0.5 h         | 1                                | 390/490                       | 44        |
| SPI       |  | PBS                                 | 8 min         | 0.0116                           | 413/511                       | 45        |
| 5         |  | HEPES                               | 40 min        | 0.1                              | 375/473                       | 46        |
| Mito-PF   |  | DMSO/PBS                            | 35 min        | 0.771                            | 450/560                       | 47        |
| LDT       |  | Pure THF                            | 4 h           | 0.35                             | 380/450                       | 48        |
| DTP       |  | DMSO/HEPES                          | 5 min         | 0.044                            | 510/590                       | This work |

**Table S2** Test the fluorescence intensity of **DTP** (20  $\mu$ M) containing serum in DMSO-HEPES buffer (50 mM, pH = 7.4, 9: 1, v/v).

| Number | 1     | 2     | 3     | 4     | 5     | 6     | 7     | 8     | 9     | 10    | SD    |
|--------|-------|-------|-------|-------|-------|-------|-------|-------|-------|-------|-------|
| FI     | 19.70 | 19.69 | 19.72 | 19.73 | 19.72 | 19.70 | 19.69 | 19.72 | 19.71 | 19.71 | 0.013 |
